# Supplementary material for: From caves to seamounts: the hidden diversity of tetractinellid sponges from the Balearic Islands, with the description of eight new species
Source: PeerJ. 2024 Mar 4;12:e16584. doi: 10.7717/peerj.16584 (PMC11636720; doi:10.7717/peerj.16584)
Supplement: Table S1 [file peerj-12-16584-s007.xlsx]

## Sheet: MUSEUM AND FIELD CODES
Species (alphabetical order)	Field#	Museum#
Calthropella (Calthropella) pathologica	i693	UPSZMC 190806		Museum of Evolution (Uppsala)	UPSZMC	Non type material
Calthropella (Calthropella) pathologica	i682	UPSZMC 190807			UPSZTY	Type material
Caminella intuta	LIT05	UPSZMC 190808		Museo Nacional de Ciencias Naturales (Madrid)	MNCN
Caminus vulcani	i142_C	UPSZMC 190809		Naturalis Biodiversity Center (Leiden)	ZMAPOR
Caminus vulcani	i254_4	UPSZMC 190810		Colección Poríferos del Cantábrico (IEO-CSIC, Gijón)	CPORCANT
Caminus vulcani	i391_2	UPSZMC 190811		Coleção de Referência Biológica Marinha dos Açores	COLETA
Caminus vulcani	i526	UPSZMC 190812
Caminus xavierae sp. nov. holotype	CAN.07.05	UPSZTY 190813, ZMAPOR 20422
Caminus xavierae sp. nov. paratype	CAN.O7.O6	UPSZTY 190814
Characella pachastrelloides	i527	UPSZMC 190815
Characella tripodaria	i153_1B	UPSZMC 190816
Characella tripodaria	i153_4B	UPSZMC 190817
Characella tripodaria	i777	UPSZMC 190818
Craniella cf. cranium	i172_1A	UPSZMC 190819
Craniella cf. cranium	i151_1B	UPSZMC 190910
Craniella cf. cranium	i153_4_1	UPSZMC 190873
Craniella cf. cranium	i339_5	UPSZMC 190820
Craniella cf. cranium	i409_1_1	UPSZMC 190821
Craniella cf. cranium	i416_D	UPSZMC 190822
Craniella cf. cranium	i826_7_1(G)	UPSZMC 190823
Discodermia polymorpha	i141_1	UPSZMC 190824
Discodermia polymorpha	i141_2	UPSZMC 190825
Discodermia polymorpha	i141_3	UPSZMC 190826
Discodermia polymorpha	i196_1	UPSZMC 190827
Discodermia polymorpha	i196 (x3)	UPSZMC 190828
Discodermia polymorpha	i277_1	UPSZMC 190829
Discodermia polymorpha	i277 (x4)	UPSZMC 190830
Discodermia polymorpha	i294	UPSZMC 190831
Discodermia polymorpha	i308	UPSZMC 190832
Discodermia polymorpha	i320	UPSZMC 190833
Discodermia polymorpha	i321	UPSZMC 190834
Discodermia polymorpha	i322	UPSZMC 190835
Discodermia polymorpha	i354	UPSZMC 190836
Discodermia polymorpha	i606	UPSZMC 190837
Erylus cf. deficiens	LIT10	UPSZMC 190838
Erylus corsicus	i140_2B	UPSZMC 190839
Erylus corsicus	i356_A	UPSZMC 190840
Erylus corsicus	i389_1	UPSZMC 190841
Erylus corsicus	i402_A	UPSZMC 190842
Erylus corsicus	i402_B	UPSZMC 190843
Erylus corsicus	i402_C	UPSZMC 190844
Erylus corsicus	i707	UPSZMC 190845
Erylus discophorus	POR785	UPSZMC 190846
Erylus discophorus	LIT71	UPSZMC 190847
Erylus discophorus	LIT72	UPSZMC 190848
Erylus discophorus	LIT74	UPSZMC 190849
Erylus cf. mamillaris	i142_B	UPSZMC 190850
Erylus cf. mamillaris	i179_A	UPSZMC 190851
Erylus cf. mamillaris	i179_B	UPSZMC 190852
Erylus cf. mamillaris	i314	UPSZMC 190853
Erylus cf. mamillaris	i329_A	UPSZMC 190854
Erylus cf. mamillaris	i329_B	UPSZMC 190855
Erylus cf. mamillaris	i329_C	UPSZMC 190856
Geodia bibilonae sp. nov. holotype	i715_1	UPSZTY 190857
Geodia bibilonae sp. nov. paratype	i780	UPSZTY 190858
Geodia bibilonae sp. nov. paratype	i781	UPSZTY 190859
Geodia bibilonae sp. nov. paratype	i674	UPSZTY 190860
Geodia bibilonae sp. nov. paratype	i675	UPSZTY 190861
Geodia geodina	i140_A	UPSZMC 190862
Geodia geodina	i140_B	UPSZMC 190863
Geodia geodina	i151-3	UPSZMC 190864
Geodia geodina	i153_1A	UPSZMC 190865
Geodia geodina	i153_5B	UPSZMC 190866
Geodia geodina	i391_1	UPSZMC 190867
Geodia geodina	i391_3	UPSZMC 190868
Geodia geodina	i401_4	UPSZMC 190869
Geodia geodina	i575	UPSZMC 190870
Geodia geodina	i576	UPSZMC 190871
Geodia geodina	i708	UPSZMC 190872
Geodia matrix sp. nov. paratype	i146_1A	UPSZTY 190876
Geodia matrix sp. nov.	i146_1B	UPSZMC 190877
Geodia matrix sp. nov.	i146_1C	UPSZMC 190878
Geodia matrix sp. nov. paratype	i244_B1	UPSZTY 190879
Geodia matrix sp. nov. paratype	i545	UPSZTY 190880
Geodia matrix sp. nov. holotype	i577_1	UPSZTY 190881
Geodia matrix sp. nov. paratype	i577_2	UPSZTY 190882
Geodia microsphaera sp. nov. holotype	i589_2	UPSZTY 190883
Geodia microsphaera sp. nov. paratype	i589_3	UPSZTY 190884
Geodia microsphaera sp. nov. paratype	i589_8	UPSZTY 190885
Geodia phlegraeioides sp. nov. holotype	P224-11BT25	UPSZTY 190886, MNCN/1.01/1026
Geodia phlegraeioides sp. nov. paratype	DR15-972	UPSZTY 190887
Geodia phlegraeioides sp. nov.	DR15-862c	CPORCANT DR15-862c
Geodia phlegraeioides sp. nov.	DR15-869c	CPORCANT DR15-869c
Geodia phlegraeioides sp. nov.	DR15-882	CPORCANT DR15-882
Geodia phlegraeioides sp. nov.	DR10-490	CPORCANT DR10-490
Geodia phlegraeioides sp. nov.	DR10-500	CPORCANT DR10-500
Geodia phlegraeioides sp. nov.	COLETA#5803	COLETA#5803
Geodia phlegraeioides sp. nov.	COLETA#6243	COLETA#6243
Nethea amygdaloides	POR347_B	UPSZMC 190888
Nethea amygdaloides	POR7_15	UPSZMC 190889
Nethea amygdaloides	i215_b	UPSZMC 190890
Pachastrella monilifera	i139_A	UPSZMC 190891
Pachastrella monilifera	i139_B	UPSZMC 190892
Pachastrella monilifera	i153_3	UPSZMC 190893
Pachastrella monilifera	i157	UPSZMC 190894
Pachastrella monilifera	i278_A	UPSZMC 190895
Pachastrella monilifera	i278_C	UPSZMC 190896
Pachastrella monilifera	i352_4	UPSZMC 190897
Pachastrella monilifera	i650	UPSZMC 190898
Pachastrella monilifera	i687	UPSZMC 190899
Pachastrella monilifera	i688	UPSZMC 190900
Pachastrella monilifera	i771	UPSZMC 190901
Pachastrella monilifera	i824_1	UPSZMC 190903
Pachastrella monilifera	i827_2	UPSZMC 190904
Pachastrella ovisternata	i219_A	UPSZMC 190905
Pachastrella ovisternata	i278_B	UPSZMC 190906
Pachastrella ovisternata	i278_D	UPSZMC 190907
Pachastrella ovisternata	i394_1	UPSZMC 190908
Pachastrella ovisternata	i628	UPSZMC 190909
Pachastrella ovisternata	i808	UPSZMC 190902
Pachastrella ovisternata	i818_1	UPSZMC 190911
Pachastrella ovisternata	i820_1	UPSZMC 190912
Penares candidatus	i143_G	UPSZMC 190913
Penares candidatus	i315_A	UPSZMC 190914
Penares candidatus	i315_B	UPSZMC 190915
Penares candidatus	i315_C	UPSZMC 190916
Penares cavernensis sp. nov. paratype	LIT45	UPSZTY 190917
Penares cavernensis sp. nov. holotype	LIT55	UPSZTY 190918
Penares cavernensis sp. nov. paratype	LIT65	UPSZTY 190919
Penares euastrum	i530	UPSZMC 190920
Penares euastrum	i142_A	UPSZMC 190921
Penares euastrum	i146_4	UPSZMC 190922
Penares euastrum	i244_A	UPSZMC 190923
Penares euastrum	i524_b	UPSZMC 190924
Penares euastrum	i508	UPSZMC 190925
Penares euastrum	i528	UPSZMC 190926
Penares euastrum	i529	UPSZMC 190927
Penares euastrum	POR469	UPSZMC 190928
Penares euastrum	POR932_1	UPSZMC 190929
Penares euastrum	POR975	UPSZMC 190930
Penares euastrum	POR1141	UPSZMC 190931
Penares euastrum	POR1253	UPSZMC 190932
Penares helleri	i142_D	UPSZMC 190933
Penares helleri	i152	UPSZMC 190934
Penares helleri	i233	UPSZMC 190935
Penares helleri	i739	UPSZMC 190936
Penares helleri	POR946	UPSZMC 190937
Penares isabellae sp. nov. holotype	LIT48	UPSZTY 190938
Penares isabellae sp. nov. paratype	LIT40_1	UPSZTY 190939
Penares isabellae sp. nov. paratype	LIT66	UPSZTY 190940
Poecillastra compressa	i808_9	UPSZMC 190941
Poecillastra compressa	i809	UPSZMC 190942
Stelletta mediterranea	i757	UPSZMC 190943
Stelletta dichoclada	i589_1	UPSZMC 190944
Stelletta dichoclada	i715_2	UPSZMC 190945
Stelletta dichoclada	i416_A	UPSZMC 190946
Stelletta dichoclada	i416_B	UPSZMC 190947
Stelletta dichoclada	i416_F	UPSZMC 190948
Stelletta lactea	ATL01	UPSZMC 190949
Stelletta mortarium sp. nov. paratype	i352_1	UPSZTY 190950
Stelletta mortarium sp. nov. paratype	i352_2	UPSZTY 190951
Stelletta mortarium sp. nov. paratype	i401_2	UPSZTY 190952
Stelletta mortarium sp. nov. paratype	i406_A	UPSZTY 190953
Stelletta mortarium sp. nov. paratype	i406_B	UPSZTY 190954
Stelletta mortarium sp. nov.	i582	UPSZMC 190955
Stelletta mortarium sp. nov.	i594	UPSZMC 190956
Stelletta mortarium sp. nov. holotype	i714_1	UPSZTY 190957
Stelletta stellata	PC1140	UPSZMC 190958
Stryphnus mucronatus	i827_1	UPSZMC 190959
Stryphnus mucronatus	POR1196	UPSZMC 190960
Stryphnus mucronatus	POR715	UPSZMC 190961
Stryphnus ponderosus	i208_a	UPSZMC 190962
Stryphnus ponderosus	i208_b	UPSZMC 190963
Stryphnus ponderosus	POR778_1	UPSZMC 190964
Stryphnus ponderosus	POR778_2	UPSZMC 190965
Stryphnus ponderosus	POR798	UPSZMC 190966
Thenea muricata	i232_1	UPSZMC 190967
Thrombus abyssi	i391_5_1	UPSZMC 190968
Thrombus abyssi	i391_6	UPSZMC 190969
Thrombus abyssi	i470	UPSZMC 190970
Vulcanella aberrans	i139_B1	UPSZMC 190971
Vulcanella cf. gracilis	i279_A	UPSZMC 190972
Vulcanella cf. gracilis	i279_B	UPSZMC 190973
Vulcanella gracilis	i303_b	UPSZMC 190974
Vulcanella gracilis	i303_c	UPSZMC 190975
Vulcanella gracilis	i416_c	UPSZMC 190976
Vulcanella gracilis	i818_2	UPSZMC 190977

## Sheet: GENBANK AND SBP CODES
		COI Full Folmer	COI Folmer+Erpenbeck	COI minibarcodes (130 bp)	28S C1-C2	28S C1-D2
Species	Field#	Genbank ID	Genbank ID	Sponge Barcoding Project ID	Genbank ID	Genbank ID
Geodia geodina	i575	ON130519			ON133879
Geodia geodina	i708	ON130520			ON133880
Geodia geodina	i576	ON130521
Geodia geodina	i140_A	ON130522
Geodia phlegraeioides sp. nov.	COLETA5803	OR045842
Geodia phlegraeioides sp. nov.	COLETA6243	OR045843
Geodia phlegraeioides sp. nov.	DR15-869c (CPORCANT)	OR045845
Geodia phlegraeioides sp. nov.	P224-11BT25	OR045844
Geodia matrix sp. nov	i244_B	ON130523			ON133885
Geodia matrix sp. nov	i577_1	ON130524			ON133886
Geodia matrix sp. nov	i577_2	ON130525			ON133887
Geodia bibilonae sp. nov.	i780	ON130526			ON133882
Geodia bibilonae sp. nov.	i674	ON130527			ON133883
Geodia bibilonae sp. nov.	i715_1	ON130528			ON133881
Geodia microsphaera sp. nov.	i589_2	ON130529			ON133884
Erylus cf. mamillaris	i329_B	ON130530			ON133855
Erylus discophorus	POR785	ON130531			ON133854
Erylus discophorus	LIT71	ON130532
Erylus discophorus	LIT72	ON130533
Erylus discophorus	LIT74	ON130534
Erylus cf. deficiens	LIT10	ON130535			ON133853
Erylus corsicus	i707	ON130536			ON133851
Erylus corsicus	i402_B	ON130537
Penares helleri	i739	ON130538			ON133859
Penares helleri	POR946	ON130539			ON133858
Penares euastrum	i530			SBP#2683	ON133852
Penares euastrum	POR932_1			SBP#2684
Penares cavernensis sp. nov.	LIT55			SBP#2685
Penares isabellae sp. nov.	LIT40_1	ON130540			ON133860
Penares isabellae sp. nov.	LIT48	ON130541
Penares isabellae sp. nov.	LIT66	ON130542
Penares candidatus	i315_B	ON130543			ON133857
Nethea amygdaloides	POR347_B	ON130544
Nethea amygdaloides	POR7_15	ON130545
Nethea amygdaloides	i215_b			SBP#2686	ON133878
Caminus vulcani	i526	ON130546			ON133892
Caminella intuta	LIT05	ON130547			ON133877
Calthropella (Calthropella) pathologica	i693	ON130548			ON133856
Calthropella (Calthropella) pathologica	i682			SBP#2687
Discodermia polymorpha	i606	ON130549			ON133891
Discodermia polymorpha	i321	ON130550			ON133890
Discodermia polymorpha	i320				ON133889
Characella pachastrelloides	i527	ON130551			ON133873
Characella tripodaria	i777	ON130552			ON133871
Characella tripodaria	i153_1B			SBP#2690	ON133872
Poecillastra compressa	i808_9	ON130553
Poecillastra compressa	i809	ON130554			ON133870
Vulcanella gracilis	i818_2	ON130555			ON133869
Stryphnus mucronatus	i827_1	ON130556
Stryphnus mucronatus	POR1196	ON130557
Stryphnus mucronatus	POR715			SBP#2688
Stryphnus ponderosus	i208_b			SBP#2689
Pachastrella ovisternata	i820_1				ON133875
Pachastrella monilifera	i688	ON130559			ON133874
Pachastrella monilifera	i771	ON130560
Pachastrella monilifera	i808	ON130558			ON133876
Thrombus abyssi	i470	ON130561			ON133868
Stelletta mortarium sp. nov.	i352_1	ON130562			ON133861
Stelletta mortarium sp. nov.	i594	ON130563			ON133862
Stelletta mortarium sp. nov.	i714_1	ON130564			ON133863
Stelletta lactea	ATL01	ON130565			OR044718
Stelletta dichoclada	i589_1	ON130566				ON133864
Stelletta dichoclada	i715_2	ON130567				ON133866
Stelletta dichoclada	i416_A					ON133865
Stelletta mediterranea	i757	ON130568				ON133867
Thenea muricata	i232_1	ON130569			ON133888
Craniella cf. cranium	i172_1A		OR045914		ON133849
Craniella cf. cranium	i416_D		OR045913		ON133850
